# Supplementary material
Source: PubMed Central journal article supplement (PMC4686778)
Supplement: ncomms10099-s1.pdf [file ncomms10099-s1.pdf]

### Alpha adducin rat

1 MNGDTRAAVV TSPPTTAPH KERYFDR**VDE NNPEYLRERN MAPDLRQDFN**  
51 **MMEQK**KRVSM ILQSPAFCEE LESMIQEQFK KGKNPTGLLA LQIADFMTA  
101 SVPNVYPAAP QGGMAALNMS LGMVTPVNDL **RGSDSIAYDK** GEKLLRCKLA  
151 AFYRLADLFG WSQLIYNHIT TRVNSEQEHF LIVPFGLLYS EVTASSLVK**V**  
201 **NLQGDIVDRG** STNLGVNQAG FTLHSAIYAA RPDACIVHI HTPAGAAVSA  
251 MKCGLLPISP EALSLGEVAY HDYHGILVDE EEKILIQKNL GPKSKVLILR  
301 NHGLVSVGES VEEAFFYIHN LVVACEIQVR **TLASAGGPDN LVLLDPGKYK**  
351 AKSR**SPGTPA GEGSGSPPKW QIGEQEFEAL MRMLDNLGYR** TGYPYRYPAL  
401 RERSKKYSDV EVPASVTGHS FASDGDSGTC SPLRHSFQKQ QREKTRWLS  
451 GRGDASEEG QNGSSPKSKT **KWTKEDGHRT STSAVPNLFV PLNTNPKEVQ**  
501 EMRNKIR**EQN LQDIK**TAGPQ SQVLCGVMMD **RSLVQGELVT ASKAIIEKEY**  
551 **QPHVIVSTTG PNPFTLTDR ELEEYR**REVE RKQK**GSEENL DETREQEKS**  
601 PPDQSAVPNT PPSTPVK**LEG GLPQEPTSRD** GSGCHASKPT PPDLSPEPS  
651 EALAFPTVAE EAHASPDITQ PLAEADPEPA SASAPGAEEV ASPATEEGSP  
701 MDPGSDGSPG KSPSKKKKKF RTPSFLKSKS KKS

### Beta-adducin isoform a rat

1 MSEDTPVEAA SPPPSQGQHY FDR**FSEDDPE YLR**LRNRAAD LR**QDFNLMEQ**  
51 **KKRVTMILQS PSFREELEGL IQEQMKKGNN SSNIWALR**QI ADFMASTSHA  
101 VFPASSMNFS MMTPIIDLHT ADSLNLAKGE RLMRCKISSV YRLLDLYGWA  
151 QLSDTYVTLR VSKEQDHFLI SPKGVSCSEV TASSLIK**VNI LGEVVEKGSS**  
201 CFPVDTTGF S LHSAIYAARP DVRCAIHLHT PATAAVSAMK CGLLPVSHNA  
251 LLVGD MAYYD FNGEMEQEAD RINLQKCLGP TCKILVLRNH GMVALGDTVE  
301 EAFYKVFHLQ AACEVQVSAL SSAGGTENLI LLEQEKHRPH EVGSVQWAGS  
351 TFGPMQKSRL GEHEFEALMR **MLDNLGYR**TG YTYRHPFVQE KTKHK**SEVEI**  
401 **PATVTAFFVE EDGVPV PALR** QHAQKQKEK TRWLNTPNY **LRVNVADDEVQ**  
451 **RNMGSPRPKT TWMKADEVEK SSSGMPRIE NPNQFVPLYT DPQEVLD MRN**  
501 KIREQNRQDI **KSAGPQS QLL ASVIAEKSR S PSTESQLASK** GDADTKDELE  
551 ETVPNPFSQL TDQELEEYK EVERKKLEQE QEGEKDAATE EPGSPVK**STP**  
601 **ASPVQSPTRA** GTKSPAVSPS KASEDAKTE VSEANTEPEP EKPEGVVVNG  
651 **KEEEPSVEEV LSKGPGQMTT NADTDGDSYK DKTESVTSGP LSPEGSPSKS**  
701 PSKKKKKFR T PSFLKSKSKK EKVES

**Supplementary Fig. 1. Mass spectrometry identification of adducin peptides in DARPP-32 binding proteins.** Lysates from rat striatum were incubated with DARPP-32-Sepharose or casein-Sepharose. After washing, bound proteins were eluted with a NaCl step gradient. Major bands apparent on Coomassie-stained polyacrylamide gel in DARPP-32 eluates but not casein eluates were excised. After tryptic digestion peptides were identified by LC-MS/MS. The analysis of a band migrating with an apparent MW of 120,000 and eluted from DARPP-32 identified  $\alpha$ -adducin (gi|785039, 26.5% coverage,  $p = 2.4 \cdot 10^{-51}$ ) and  $\beta$ -adducin isoform a (gi|158081763, 31.7% coverage,  $p = 3.4 \cdot 10^{-65}$ ). Peptides from these two proteins were not recovered from casein-Sepharose. The identified peptides are indicated in bold, highlighted yellow.

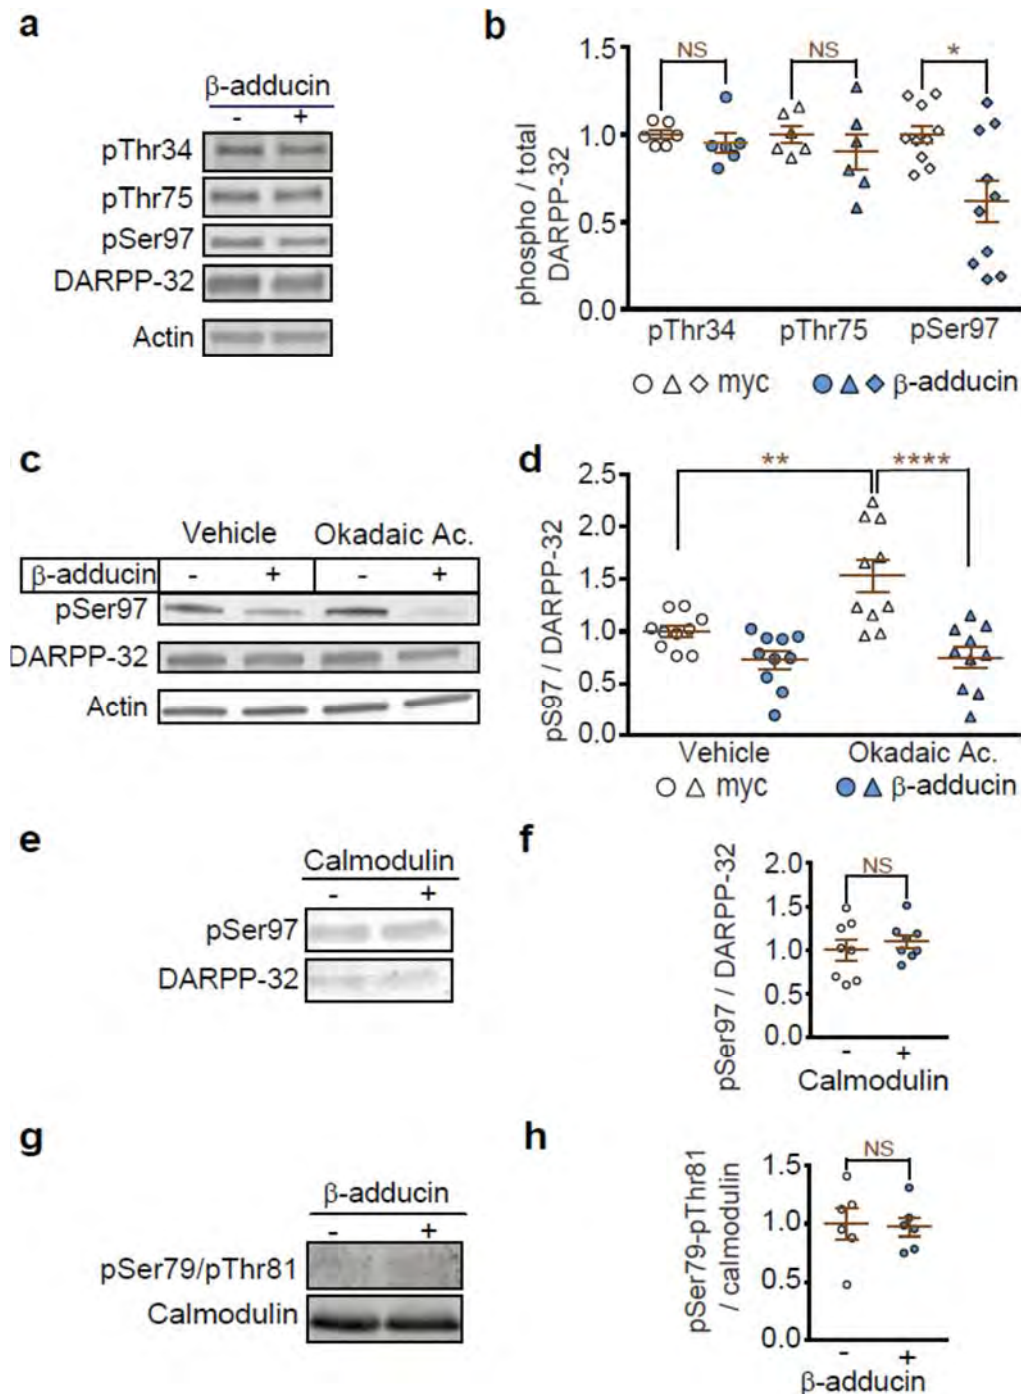

**Supplementary Fig. 2. β-adducin alters phosphorylation of DARPP-32 Ser97.** **a)** COS7 cells were co-transfected with DARPP-32-GFP and myc vector (-) or myc-β-adducin (+). pThr34, pThr75, and pSer97 in DARPP-32, the total amounts of this protein, and actin as loading control, were analyzed by immunoblotting of COS-7 cells lysates. **b)** Quantification of results as in (a). Data are means + SEM; n = 6-10 per group from >3 experiments; Student's *t*-test, pThr34,  $t_{10} = 0.78$ , NS, pThr75,  $t_{10} = 0.89$ , NS, pSer97,  $t_{18} = 2.92$ ,  $p < 0.01$ . **c)** COS7-cells were transfected with DARPP-32-GFP in the presence of absence of myc-β-adducin and incubated for 30 min with vehicle (-) or okadaic acid (200 nM, +). pSer97 and total DARPP-32, and actin as loading control, were analyzed by immunoblotting. **d)** Quantification

of results as in (c). Data are means + SEM; n=10 per group from 3 experiments; two-way ANOVA:  $\beta$ -adducin factor,  $F_{(1,36)} = 25.89$ ,  $p < 10^{-4}$ ; okadaic acid factor,  $F_{(1,36)} = 7.17$ ,  $p = 0.01$ ; interaction,  $F_{(1,36)} = 6.09$ ,  $p = 0.02$ ; Šidák post-hoc test, \*\*,  $p < 0.01$ , \*\*\*\*,  $p < 10^{-4}$ . **e)** Purified DARPP-32 was incubated with CK2 and 100  $\mu$ M ATP in the absence (-) or presence (+) of calmodulin. Phosphorylation of Ser97 (pSer97) and total DARPP-32 were analyzed by immunoblotting. **f)** Quantification of results as in (e). Data are means + SEM; n=8 per group from 2 experiments; Student's  $t$ -test:  $t_{14} = 0.72$ , NS. **g)** Conditions were as in (c) except that DARPP-32 was replaced by calmodulin as CK2 substrate. Calmodulin phosphorylation on Ser79/Thr81 (pSer79/pThr81) and total calmodulin were analyzed by immunoblotting. **h)** Quantification of results as in (g). Data are means + SEM; n = 6 per group from 2 experiments; Student's  $t$ -test,  $t_{10} = 0.18$ , NS.

**a**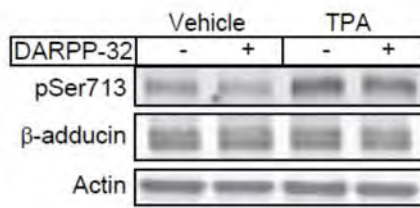**b**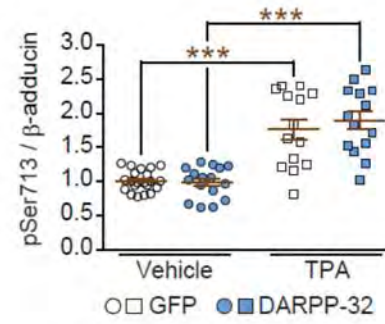**c**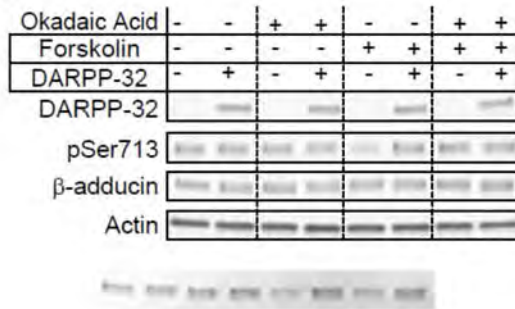**d**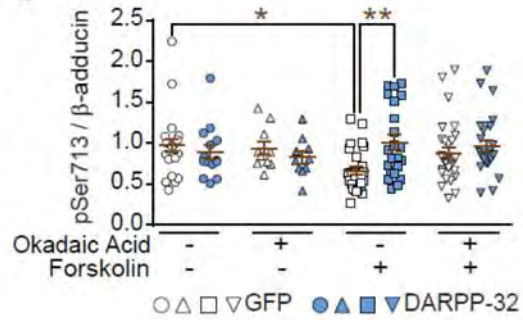**e**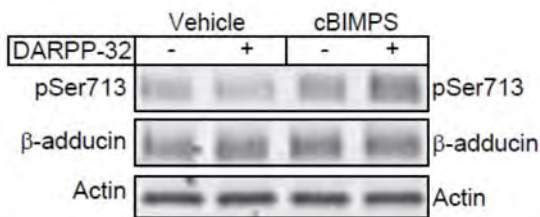**f**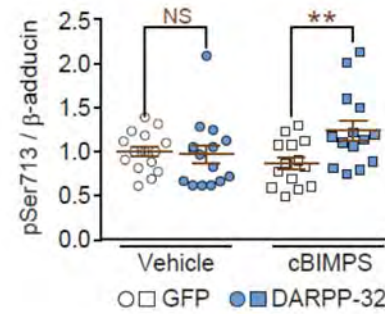**g**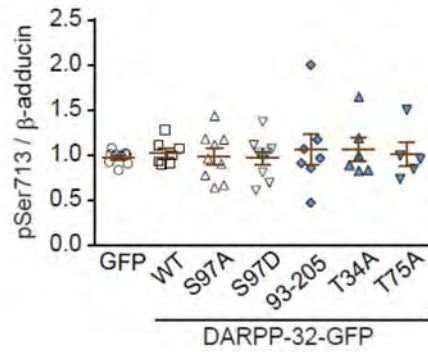**h**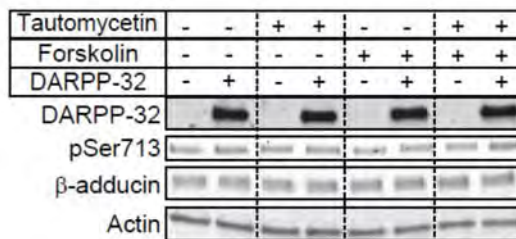**i**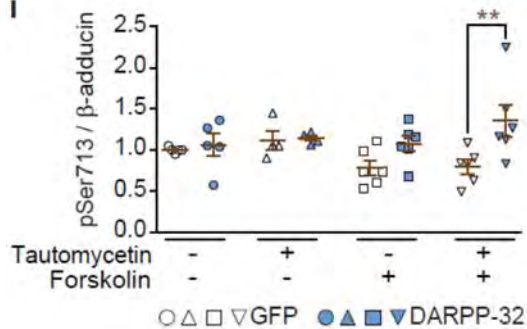**j**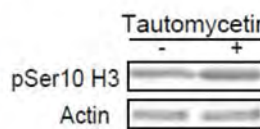**k**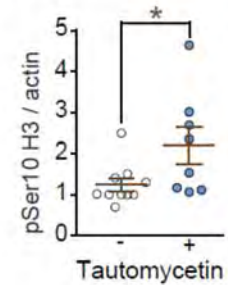

**Supplementary Fig. 3. DARPP-32 modulates cAMP-induced phosphorylation of  $\beta$ -adducin Ser713.** **a)** COS7 cells co-transfected with myc- $\beta$ -adducin and GFP (DARPP-32 -) or DARPP-32-GFP (DARPP-32 +) were incubated for 20 min with vehicle (DMSO, 1:1,000 final) or 50 nM TPA. Samples were analyzed by immunoblotting with the indicated antibodies. **b)** Quantification of results as in (a). Data are means + SEM; n=14-21 per group; two-way ANOVA: TPA factor:  $F_{(1,61)} = 79.8$ ,  $p < 0.10^{-4}$ ; DARPP-32 factor,  $F_{(1,61)} = 0.31$ , NS; no interaction,  $F_{(1,61)} = 0.61$ , NS; Šidák post-hoc test vs vehicle, \*\*\*,  $p < 0.001$ . **c)** COS7-cells were co-transfected with myc- $\beta$ -adducin and either GFP (DARPP-32 -) or DARPP-32-GFP (DARPP-32 +) and incubated for 30 min in the absence (-) or presence (+) of forskolin (100  $\mu$ M) and okadaic acid (OA, 200 nM), as indicated. pSer713, total  $\beta$ -adducin, DARPP-32, and actin as loading control, were analyzed by immunoblotting. **d)** Quantification of results as in (c). Data are means + SEM; n=10-29 per group from >3 experiments; two-way ANOVA: drugs factor,  $F_{(3,153)} = 0.4827$ ,  $p = 0.69$ ; DARPP-32 factor,  $F_{(1,153)} = 1.05$ ,  $p = 0.3$ ; interaction  $F_{(3,153)} = 3.10$ ,  $p = 0.03$ ; Šidák post-hoc test, \*,  $p < 0.05$ , \*\*,  $p < 0.01$ . **e)** COS7 cells were co-transfected as in (a) and incubated for 20 min with vehicle (DMSO 1/1,000 final) or the cell permeant cAMP-analog Sp 5,6-DCI-cBIMPS (cBIMPS, 10  $\mu$ M). Samples were analyzed by immunoblotting as in (a). **f)** Quantification of results as in (e). Data are means + SEM. N = 16-25 per group, >3 experiments; two-way ANOVA: cBIMPS factor,  $F_{(1,62)} = 0.01$ , NS; DARPP-32 factor,  $F_{(1,62)} = 5.77$ ,  $p = 0.02$ ; interaction,  $F_{(1,77)} = 4.78$ ,  $p = 0.03$ ; Šidák post-hoc test vs vehicle, \*\*,  $p < 0.01$ . **g)** COS7-cells were transfected with myc- $\beta$ -adducin and GFP or various forms of DARPP-32-GFP, as indicated. Cells were incubated for 20 min with 1:1,000 DMSO (vehicle) and lysates were analyzed by immunoblotting for pSer713 and  $\beta$ -adducin. Data are means + SEM; n = 5-9 per group; one-way ANOVA:  $F_{(6,45)} = 1.2$ ,  $p = 0.32$ . **h)** COS7-cells were co-transfected with myc- $\beta$ -adducin and either GFP (DARPP-32 -) or DARPP-32-GFP (DARPP-32 +) and incubated for 30 min with tautomycetin (200 nM), forskolin (100  $\mu$ M), or both, as indicated. DARPP-32, pSer713 and total  $\beta$ -adducin, and actin as loading control, were analyzed by immunoblotting. **i)** Quantification of results as in (h). Data are means + SEM; n=4-6 per group from 3 experiments; two-way ANOVA: DARPP-32 factor,  $F_{(3,34)} = 7.77$ ,  $p = 0.009$ ; drugs factor,  $F_{(3,34)} = 1.00$ ,  $p = 0.4$ ; interaction  $F_{(3,34)} = 2.12$ ,  $p = 0.12$ ; Šidák post-hoc test, \*\*,  $p < 0.01$ . **j)** COS7-cells were treated for 30 min with 50  $\mu$ M tautomycetin and lysates were immunoblotted for pSer10 histone H3 and actin as a loading control. **k)** Quantification of results as in (j). Data are means + SEM; n = 8-10 per group; Student's *t*-test,  $t_{(16)} = 2.23$ , \*,  $p < 0.05$ .

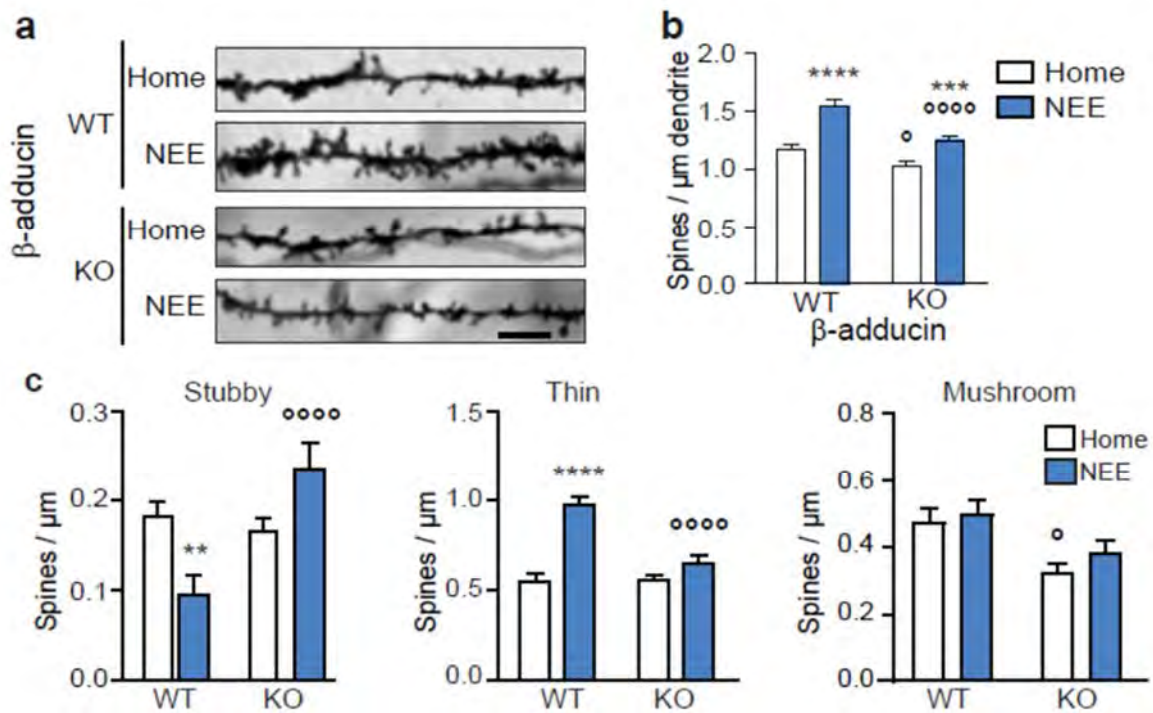

**Supplementary Fig. 4. Role of  $\beta$ -adducin in dendritic spines alterations induced by NEE.** (a) Wild-type and  $\beta$ -adducin KO littermate mice were housed in their home cage or exposed to 24-h NEE before sacrifice. Dendritic spines were visualized by Golgi-cox stain. Scale bar: 2  $\mu$ m. (b) Spine density was measured with ImageJ in 45-59 dendrites per group of 3 animals. Two-way ANOVA: housing factor  $F_{(1,211)} = 46.75$ ,  $p < 10^{-4}$ ; genotype effect  $F_{(1,211)} = 25.92$ ,  $p < 10^{-4}$ ; no interaction  $F_{(1,211)} = 2.97$ . Šidák post-hoc test, NEE vs home cage, \*\*\*,  $p < 0.001$ , \*\*\*\*,  $p < 10^{-4}$ ; KO vs wild-type, °,  $p < 0.05$ , °°,  $p < 10^{-4}$ . (c) On a subset of dendrites (16-20 dendrites per group) spines were classified according to their morphology and the density of stubby, thin, and mushroom spines was measured separately. Data are means + SEM; two-way ANOVA: stubby spines, housing effect,  $F_{(1,74)} = 0.13$ ,  $p = 0.7$ , NS; genotype effect,  $F_{(1,74)} = 8.64$ ,  $p = 0.004$ ; interaction,  $F_{(1,74)} = 13.32$ ,  $p = 0.0005$ ; thin spines, housing effect  $F_{(1,74)} = 33.31$ ,  $p < 10^{-4}$ ; genotype effect  $F_{(1,74)} = 12.83$ ,  $p = 0.0006$ ; interaction  $F_{(1,74)} = 14.06$ ,  $p = 0.0003$ ; mushroom spines, housing effect  $F_{(1,74)} = 1.13$ ,  $p = 0.29$ , NS; genotype effect:  $F_{(1,74)} = 10.94$ ,  $p = 0.0015$ ; no interaction  $F_{(1,74)} = 0.18$ ; Šidák post-hoc test, NEE vs home cage, \*\*,  $p < 0.01$ , \*\*\*\*,  $p < 10^{-4}$ ; KO vs WT, °,  $p < 0.05$ , °°,  $p < 10^{-4}$ .

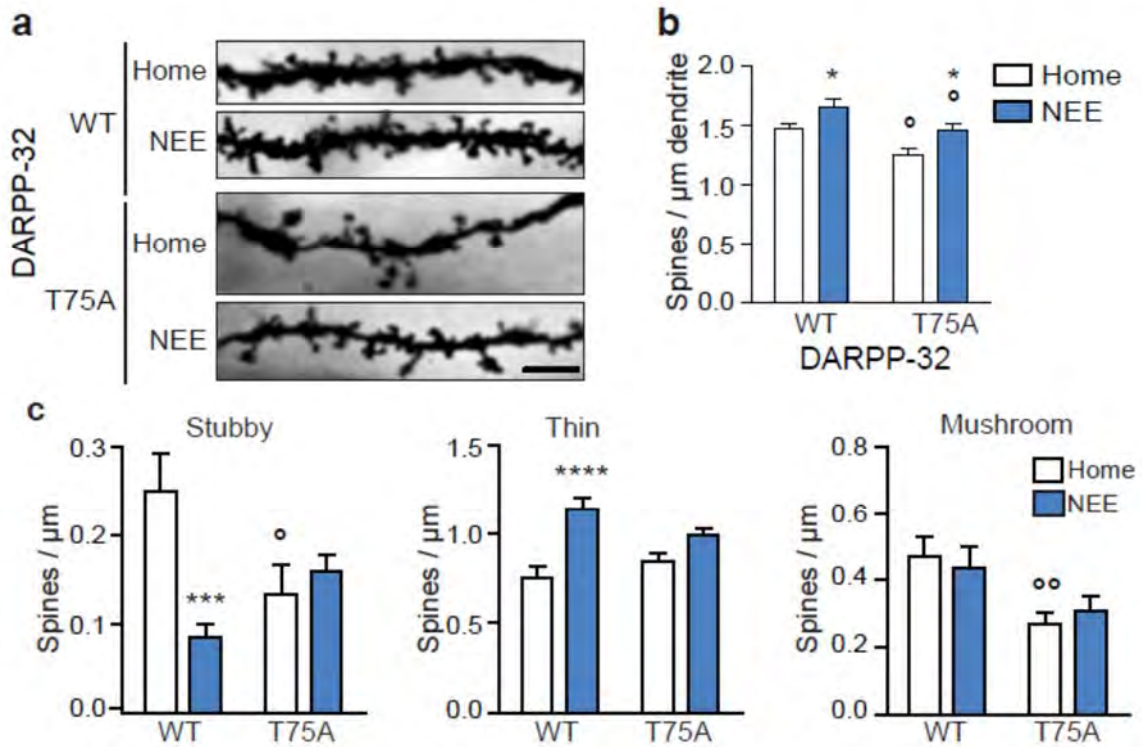

**Supplementary Fig. 5. Role of DARPP-32 Thr34 in dendritic spines alterations induced by NEE.** (a) Wild-type and T75A DARPP-32 mutant littermate mice were housed in their home cage or exposed to 24-h NEE before sacrifice and dendritic spines were visualized by Golgi-cox stain as in (Suppl. Fig. 4a). Scale bar: 2  $\mu\text{m}$ . (b) Spine density was measured in 42-52 dendrites per group of 3 animals. Two-way ANOVA: housing factor  $F_{(1,193)} = 12.32$ ,  $p < 0.001$ ; genotype effect  $F_{(1,193)} = 14.47$ ,  $p < 0.001$ ; no interaction  $F_{(1,193)} = 0.005$ . Šidák post-hoc test, NEE vs home cage, \*,  $p < 0.05$ ; T75A vs wild-type, °,  $p < 0.05$ . (c) On a subset of dendrites (16-20 dendrites per group) spines were classified according to their morphology and the density of stubby, thin, and mushroom spines was measured separately. Data are means + SEM; two-way ANOVA: stubby spines, housing effect,  $F_{(1,67)} = 5.12$ ,  $p < 0.05$ ; genotype effect,  $F_{(1,67)} = 0.45$ ,  $p = 0.5$ , NS; interaction,  $F_{(1,67)} = 9.56$ ,  $p < 0.01$ ; thin spines, housing effect  $F_{(1,67)} = 25.31$ ,  $p < 10^{-4}$ ; genotype effect  $F_{(1,67)} = 0.28$ ,  $p = 0.6$ , NS; interaction  $F_{(1,67)} = 5.10$ ,  $p < 0.05$ ; mushroom spines, housing effect  $F_{(1,67)} = 0.003$ ,  $p = 0.96$ , NS; genotype effect:  $F_{(1,67)} = 10.67$ ,  $p < 0.01$ ; no interaction  $F_{(1,67)} = 0.50$ , NS; Šidák post-hoc test, NEE vs home cage, \*,  $p < 0.05$ , \*\*\*,  $p < 0.001$ , \*\*\*\*,  $p < 10^{-4}$ ; T75A vs WT, °,  $p < 0.05$ , °°,  $p < 0.01$ .

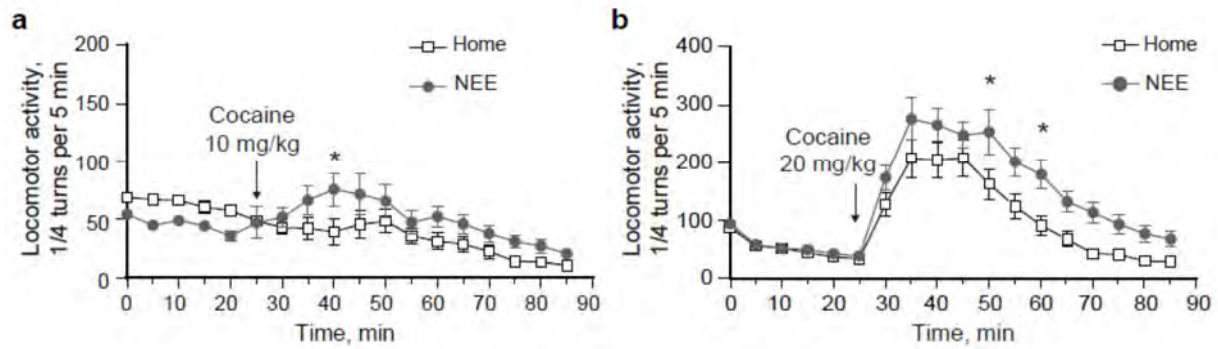

**Supplementary Fig. 6. Effects of exposure to NEE on cocaine-induced locomotor activity.** **a)** C57BL/6 mice were housed in their home cage or in a novel enriched environment (NEE) for 24 h. After a 30-min habituation in a circular maze, all mice were injected with 10 mg/kg cocaine i.p. (arrow). Locomotor activity was recorded in 5-min bins; 16 mice per group in 2 experiments. Two-way ANOVA: housing factor,  $F_{(1,540)} = 6.625$ ,  $p = 0.01$ ; time factor,  $F_{(17,540)} = 6.213$ ,  $p < 10^{-4}$ ; interaction  $F_{(1,540)} = 2.457$ ; Šidák post-hoc test for each time bin, \*,  $p < 0.05$ . **b)** Same as in (a) except that different batches of mice (14-15 mice per group in 3 experiments) were injected with 20 mg/kg cocaine i.p. (arrow). Two-way ANOVA: housing factor,  $F_{(1,486)} = 46.03$ ,  $p < 10^{-4}$ ; time factor,  $F_{(17,486)} = 30.61$ ,  $p < 10^{-4}$ ; no interaction  $F_{(1,486)} = 1.42$ ; Šidák post-hoc test for each time bin, \*,  $p < 0.05$ .



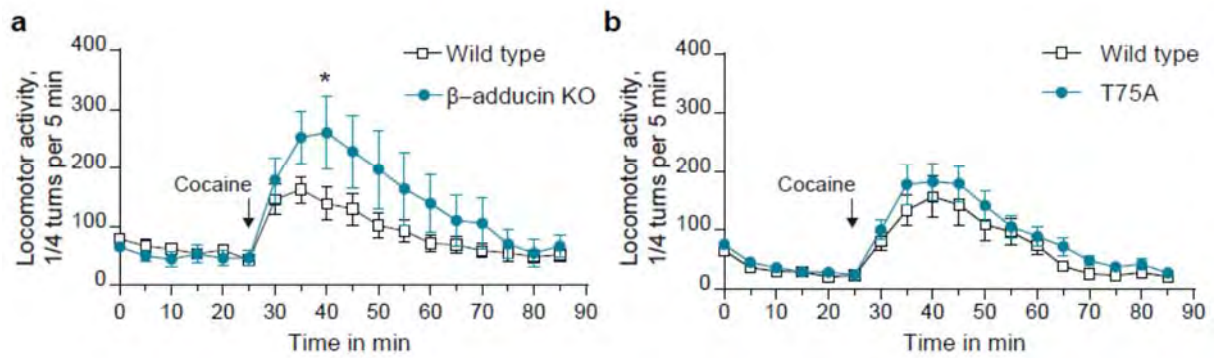

**Supplementary Fig. 7. Effects of  $\beta$ -adducin KO and T75A DARPP-32 mutation on cocaine-induced locomotor activity.** Data in this figure are identical to those in Fig. 9 for home cage-housed mice and are shown to allow direct visualization of the mutation effects. **a)** Wild type ( $n = 15$ ) and  $\beta$ -adducin KO ( $n = 8$ ) littermate mice were housed in their home cage; after a 30-min habituation in a circular maze, all mice were injected with 20 mg/kg cocaine i.p. (arrow). Locomotor activity was recorded in 5-min bins. Two-way ANOVA: genotype factor,  $F_{(1,378)} = 17.49$ ,  $p < 10^{-4}$ ; time factor,  $F_{(17,378)} = 9.42$ ,  $p < 10^{-4}$ ; interaction,  $F_{(17,378)} = 1.56$ , NS. Šidák post-hoc test for each time bin, \*,  $p < 0.05$ . a, b) Data are means  $\pm$  SEM. **b)** Wild type ( $n = 10$ ) and T75A DARPP-32 ( $n = 13$ ) littermate mice were treated and studied as in (a). Two-way ANOVA: genotype factor,  $F_{(1,378)} = 8.65$ ,  $p = 0.003$ ; time factor,  $F_{(17,378)} = 17.18$ ,  $p < 10^{-4}$ ; interaction,  $F_{(17,378)} = 0.26$ , NS. Šidák post-hoc test for each time bin, no single point was significantly different between genotypes. a, b) Data are means  $\pm$  SEM.

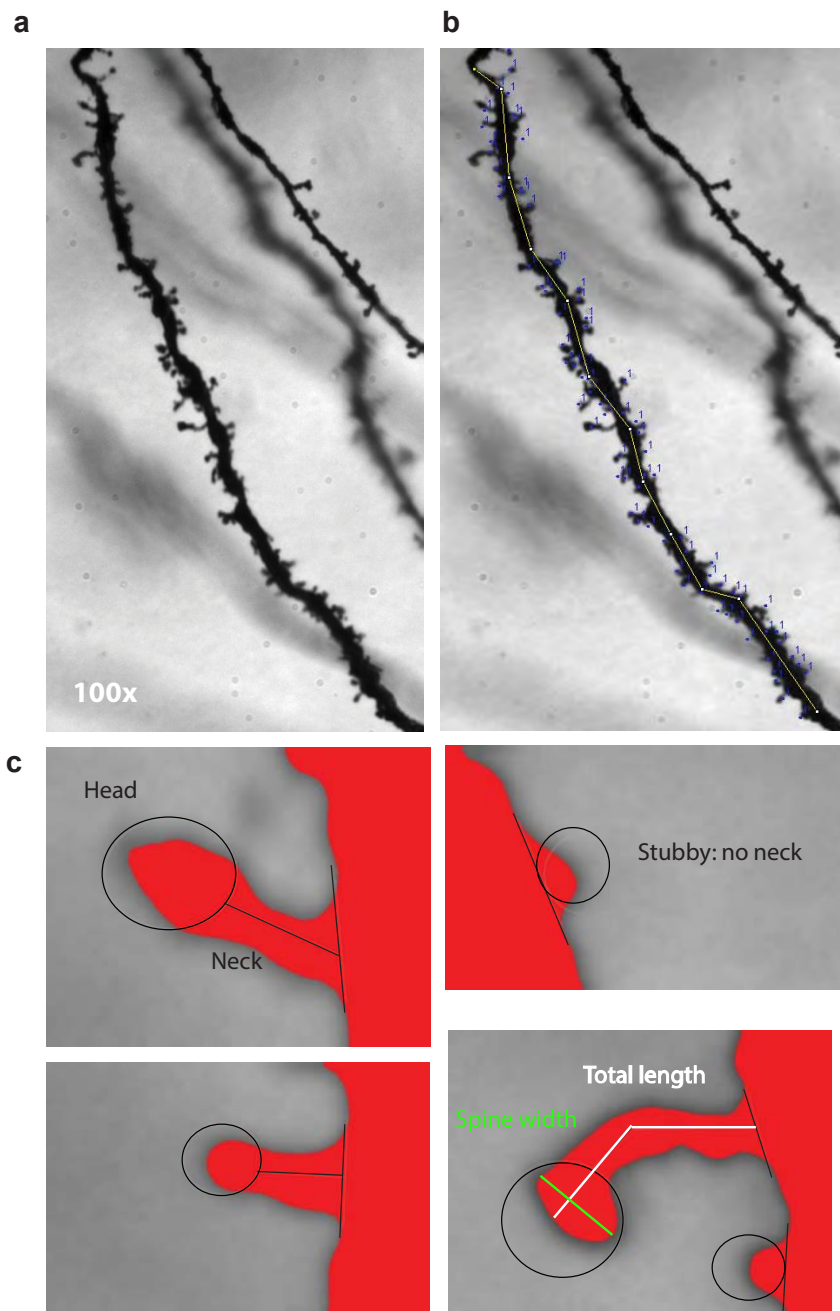

**Supplementary Fig. 8. Methods for spine measurement.** **a)** Nucleus accumbens sections were stained with the Golgi-cox method. Z-stack of 0.2  $\mu\text{m}$  optical sections were acquired in bright field at 100x resolution on a DM6000-2 microscope (Leica). **b)** Analysis of spines using ImageJ software. Spines were counted using the cell counter tool. **c)** Spines were categorized as having or not having a neck. Spines were defined as stubby if they did not contain a visible neck (right, top). Spines with necks were separated into mushroom and thin spines based on head width. Spines with heads greater than the average width were categorized as mushroom (left, top), and those with heads less than the average width were categorized as thin (left, bottom). Spine length was measured as the sum of neck length and minor head diameter (right, bottom). Spine width was measured as the major head diameter.

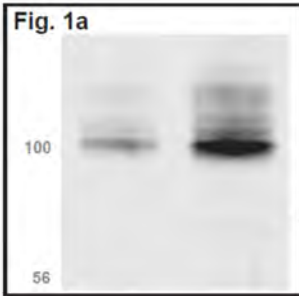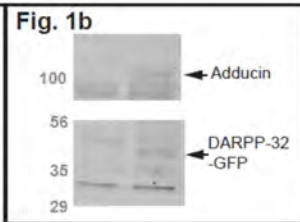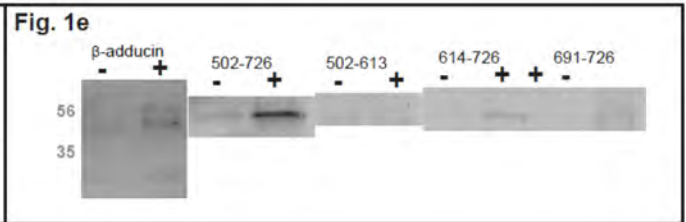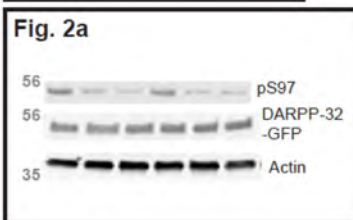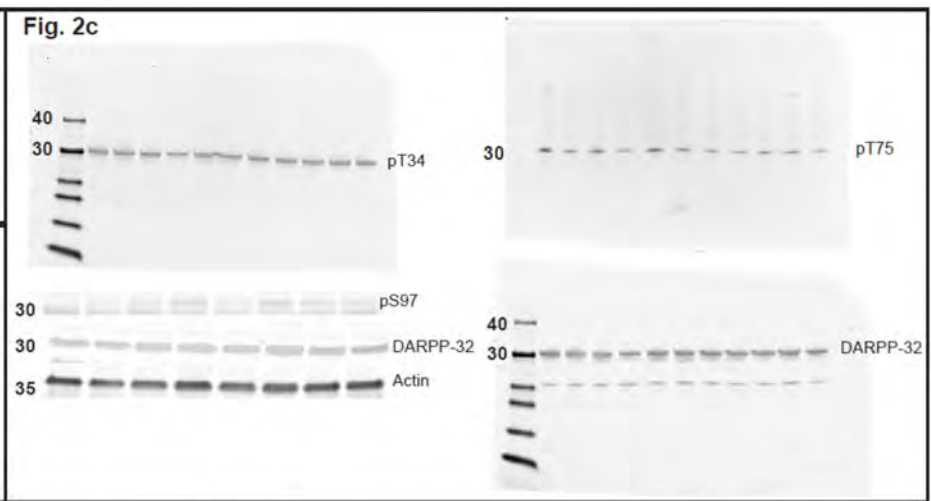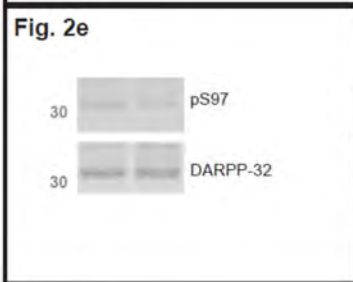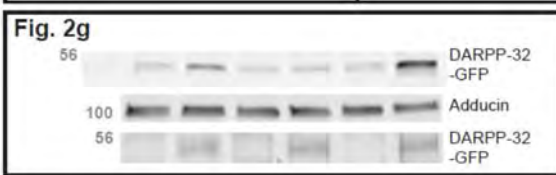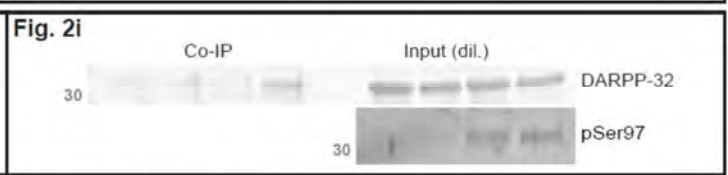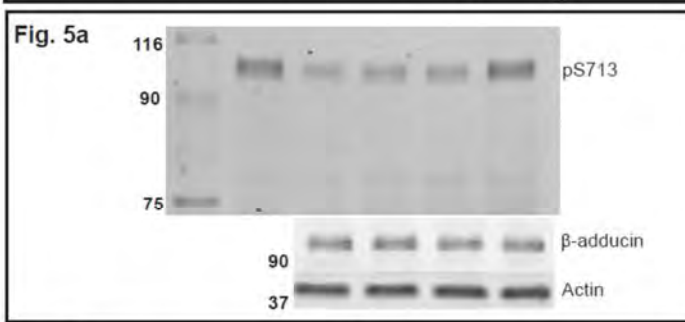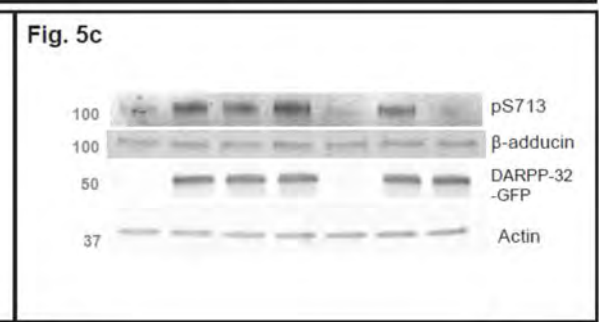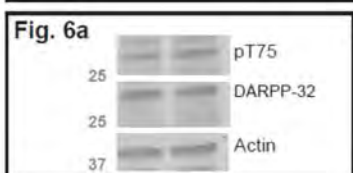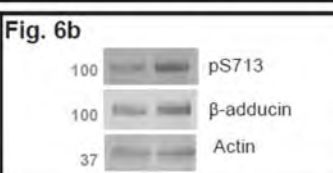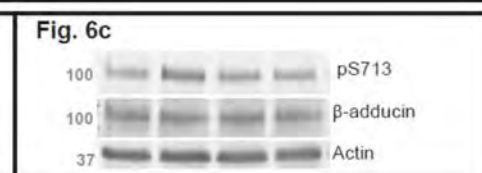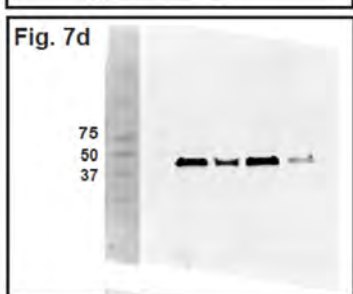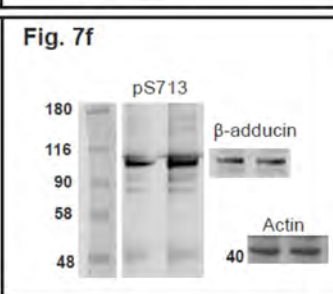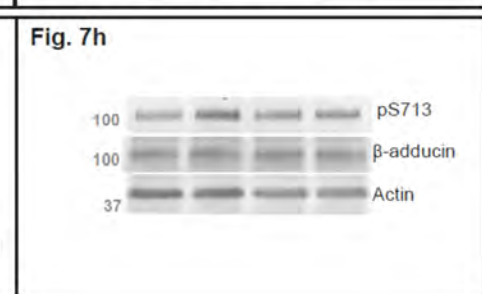

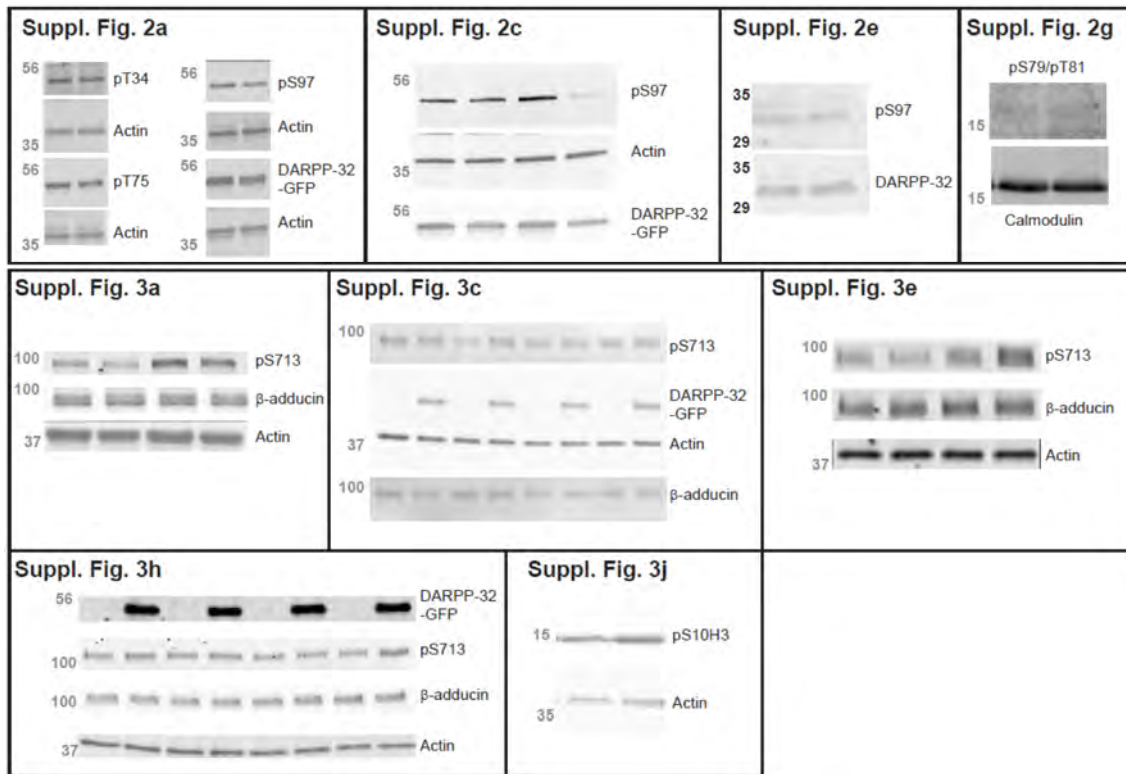

**Supplementary Fig. 9. Immunoblots used in Figures and Supplementary Figures, as indicated.** Immunoblots were revealed with infrared fluorescent antibodies detected with a LiCor Odyssey apparatus. Proteins of interest were identified using molecular weight markers or known proteins of reference. Molecular weight markers positions (kDa) are indicated in black (actual) or grey (estimated). In most experiments only cropped images including the proteins of interest were saved and are shown here. The antibody used or the position of proteins of interest are indicated.
